# Supplementary material
Source: PubMed Central journal article supplement (PMC5884172)
Supplement: NIHMS952930-supplement-13.pdf [file NIHMS952930-supplement-13.pdf]

**Table S1: miRNA oligo sequences, Related to Figure 7 and Figure S7**

| <b>miRNA</b> | <b>Sense</b>                                                             | <b>Antisense</b>                                                           |
|--------------|--------------------------------------------------------------------------|----------------------------------------------------------------------------|
| miRNA NT     | pcDNA™6.2-GW/EmGFP-miR-neg control plasmid                               |                                                                            |
| miRNA #1     | TGCTGTTACAAATCAGGCAAGA<br>TGCTGTTTTGGCCACTGACTGA<br>CAGCATCTTCTGATTTGTAA | CCTGTTACAAATCAGAAGATGCTGT<br>CAGTCAGTGGCCAAAACAGCATCTT<br>GCCTGATTTGTAAC   |
| miRNA #2     | TGCTGAGTATATGGACCTATCC<br>GCGGGTTTTGGCCACTGACTG<br>ACCCGCGGATGTCCATATACT | CCTGAGTATATGGACATCCGCGGG<br>TCAGTCAGTGGCCAAAACCCGCGG<br>ATAGGTCCATATACTC   |
| miRNA #3     | TGCTGCAAACCTGAAGAATGGT<br>CTTGGTTTTGGCCACTGACTGA<br>CCAAGACCACTTCAAGTTTG | CCTGCAAACCTGAAGTGGTCTTGGT<br>CAGTCAGTGGCCAAAACCAAGACC<br>ATTCTTCAAGTTTGC   |
| miRNA #4     | TGCTGTGCAAAGGAACCATGA<br>CACTGGTTTTGGCCACTGACTG<br>ACCAGTGTGAGTTCCTTTGCA | CCTGTGCAAAGGAACCTGACACTGG<br>TCAGTCAGTGGCCAAAACCAAGTGT<br>CATGGTTCCTTTGCAC |
