# Supplementary material
Source: PubMed Central journal article supplement (PMC5884172)
Supplement: NIHMS952930-supplement-14.pdf [file NIHMS952930-supplement-14.pdf]

**Table S2: Primer sequences used in RT-qPCR, Related to STAR Methods Section – RNA analysis**

| Gene           | Forward primer                     | Reverse primer                   |
|----------------|------------------------------------|----------------------------------|
| Human SIRT1    | TAGCCTTGTCAGATAAGGAAGG<br>A        | ACAGCTTCACAGTCAACTTTGT           |
| Murine SIRT1   | TGTGACAGAGAGATGGCTGG               | ATCTTCCAGATCCTCAAGCG             |
| Human VEGF     | AGCTGCGCTGATAGACATCC               | CTACCTCCACCATGCCAAGT             |
| Murine VEGF    | CTGTAACGATGAAGCCCTGGA<br>G         | TGGTGAGGTTTGATCCGCAT             |
| Murine MHC-I   | GCCAACTATGCTGGAGCTGAT<br>GCCC      | GGTGCGTGGAGCGCAAGTTTGTCA<br>TAAG |
| Murine MHC-IIa | GGCACAAACTGCTGAAGCAGA<br>GGC       | GGTGCTCCTGAGGTTGGTCATCAG<br>C    |
| Murine MHC-IIb | GAGCTACTGGATGCCAGTGAG<br>CGC       | CTGGACGATGTCTTCCATCTCTCC         |
| Murine MHC-IIx | GGCAGCAGCAGCTGCCGAAGC<br>AGAGTCTGG | GAGTGCTCCTCAGATTGGTCATTAG<br>C   |
| Murine HPRT    | GTTAAGCAGTACAGCCCCAAA              | AGGGCATATCCAACAACAACTT           |
| Murine GAPDH   | AGGTCGGTGTGAACGGATTTG              | TGTAGACCATGTAGTTGAGGTCA          |
| Human HEY1     | AACTGTTGGTGGCCTGAATC               | AATTCTTTGTGTTGCTGGGG             |
| Human HEY2     | TTCAAGGCAGCTCGGTAAC                | GGGCATTTTACTTCCCCAAT             |
| Human HES1     | TCAACACGACACCGGATAAAC              | GCCGCGAGCTATCTTTCTTCA            |
| Human NRARP    | TCAACGTGAACTCGTTCGGG               | ACTTCGCCTTGGTGATGAGAT            |
| Human NOTCH1   | GCAACAGCTCCTTCCACTTC               | GCCTCAGACACTTTGAAGCC             |
| Human Actin    | GTTGTGACGACGAGCG                   | GCACAGAGCCTCGCCTT                |
| Human HPRT     | ACCCTTTCAAATCCTCAGC                | GTTATGGCGACCCGCAG                |
